# Supplementary material
Source: HighWire-hosted journal article supplement (https://openres.ersjournals.com/content/9/3/00701-2022)
Supplement: inline-supplementary-material-1 [file inline-supplementary-material-1.pdf]

**Supplementary data “Sinonasal disease among patients with primary ciliary dyskinesia – an international study”**

**Table S1:** Test results supporting PCD diagnosis among EPIC-PCD participants (N=384)

| <b>Diagnostic tests indicative of PCD</b>                                                                 | <b>N (%)</b> |
|-----------------------------------------------------------------------------------------------------------|--------------|
| <b>PCD positive</b>                                                                                       |              |
| Bi-allelic pathogenic mutation or hallmark TEM defect <sup>+</sup>                                        | 257 (67)     |
| <b>PCD highly likely</b>                                                                                  |              |
| Low nNO <sup>*</sup> and HSVA findings consistent with PCD                                                | 46 (12)      |
| Low nNO <sup>*</sup> , HSVA findings consistent with PCD and non-hallmark TEM defect <sup>#</sup>         | 6 (1.6)      |
| Low nNO <sup>*</sup> , HSVA findings consistent with PCD and single allele pathogenic mutation(s)         | 3 (0.8)      |
| Low nNO <sup>*</sup> , HSVA and IF findings consistent with PCD, and single allele pathogenic mutation(s) | 2 (0.5)      |
| Low nNO <sup>*</sup> , HSVA and IF findings consistent with PCD                                           | 2 (0.5)      |
| <b>PCD probable</b>                                                                                       |              |
| HSVA findings consistent with PCD and single allele pathogenic mutation(s)                                | 5 (1.3)      |
| HSVA and IF findings consistent with PCD, and single allele pathogenic mutation(s)                        | 1 (0.3)      |
| HSVA findings consistent with PCD and non-hallmark TEM defect <sup>#</sup>                                | 2 (0.5)      |
| HSVA and IF findings consistent with PCD                                                                  | 1 (0.3)      |
| Low nNO <sup>*</sup> and single allele pathogenic mutation(s)                                             | 5 (1.3)      |
| Low nNO <sup>*</sup> and non-hallmark TEM defect <sup>#</sup>                                             | 4 (1)        |
| Low nNO <sup>*</sup> and IF findings consistent with PCD                                                  | 3 (0.8)      |
| Non-hallmark TEM defect <sup>#</sup> and single allele pathogenic mutation(s)                             | 2 (0.5)      |
| HSVA findings consistent with PCD                                                                         | 23 (6)       |
| Low nNO <sup>*</sup>                                                                                      | 7 (1.8)      |
| IF findings consistent with PCD                                                                           | 2 (0.5)      |
| Non-hallmark TEM defect <sup>#</sup>                                                                      | 1 (0.3)      |
| Single allele pathogenic mutation(s)                                                                      | 12 (3)       |

EPIC-PCD: Ear-nose throat prospective international cohort of patients with primary ciliary dyskinesia, TEM: transmission electron microscopy. ODA: outer dynein arm. IDA: inner dynein arm. nNO: nasal nitric oxide. HSVA: high-speed video microscopy analysis. IF: immunofluorescence

Results presented as N and column %. Diagnostic categories “PCD positive” and “PCD highly likely” according to ERS guidelines for diagnosis of PCD (Lucas et al)

<sup>+</sup>Hallmark TEM defects: ODA, ODA and IDA, microtubular disorganisation and IDA defects (based on BEAT-PCD TEM criteria by Shoemark et al).

<sup>#</sup>Non-hallmark TEM defects included class 2 defects such as central complex defects

<sup>\*</sup>Low nNO according to accepted thresholds such as 77nL/min for tidal breathing

**Table S2:** Results of transmission electron microscopy of EPIC-PCD participants, overall and by age group (N=197)

|                                                 | <b>Total<br/>N (%)</b> | <b>Age 0-6 y<br/>N (%)</b> | <b>Age 7-14 y<br/>N (%)</b> | <b>Age 15-30 y<br/>N (%)</b> | <b>Age 31-50 y<br/>N (%)</b> | <b>Age &gt;50 y<br/>N (%)</b> |
|-------------------------------------------------|------------------------|----------------------------|-----------------------------|------------------------------|------------------------------|-------------------------------|
| <b>Number of participants</b>                   | 197 (100)              | 22 (100)                   | 66 (100)                    | 69 (100)                     | 25 (100)                     | 15 (100)                      |
| <b>Hallmark defects<sup>+</sup></b>             |                        |                            |                             |                              |                              |                               |
| ODA & IDA-defect                                | 62 (31)                | 10 (45)                    | 17 (26)                     | 27 (40)                      | 6 (24)                       | 2 (13)                        |
| ODA-defect                                      | 27 (13)                | 1 (5)                      | 12 (18)                     | 10 (14)                      | 2 (8)                        | 2 (13)                        |
| Microtubular<br>disorganisation<br>& IDA defect | 29 (15)                | 2 (9)                      | 10 (15)                     | 10 (14)                      | 2 (8)                        | 5 (34)                        |
| <b>Non-hallmark defects<sup>#</sup></b>         |                        |                            |                             |                              |                              |                               |
| Central complex defect                          | 17 (9)                 | 0 (0)                      | 3 (4)                       | 6 (9)                        | 7 (28)                       | 1 (7)                         |
| Other                                           | 21 (11)                | 0 (0)                      | 9 (14)                      | 7 (10)                       | 3 (12)                       | 2 (13)                        |
| Normal ultrastructure                           | 41 (21)                | 9 (41)                     | 15 (23)                     | 9 (13)                       | 5 (20)                       | 3 (20)                        |

EPIC-PCD: Ear-nose throat prospective international cohort of patients with primary ciliary dyskinesia. y: years. Results presented as N and column %. ODA: outer dynein arm. IDA: inner dynein arm defect.

<sup>+</sup>Hallmark TEM defects: ODA, ODA and IDA, microtubular disorganisation and IDA defects (based on BEAT-PCD TEM criteria by Shoemark et al).

<sup>#</sup>Non-hallmark TEM defects included class 2 defects such as central complex defects

**Table S3:** Upper respiratory symptoms of past 3 months reported by EPIC-PCD participants with positive PCD diagnosis (bi-allelic mutation or hallmark TEM defect) (N=257)

|                                                                     | <b>PCD positive N (%)</b> |
|---------------------------------------------------------------------|---------------------------|
| <b>Number of participants</b>                                       | 257 (100)                 |
| <b>Nasal symptoms</b>                                               |                           |
| Daily/often                                                         | 133 (52)                  |
| Sometimes/rarely                                                    | 97 (38)                   |
| Never                                                               | 27 (11)                   |
| <b>Nasal symptoms persisting all the time<sup>a</sup></b>           | 94 (55)                   |
| <b>Type of nasal symptoms<sup>b</sup></b>                           |                           |
| Rhinorrhoea                                                         | 203 (88)                  |
| Blocked nose                                                        | 155 (67)                  |
| Sneezing                                                            | 53 (23)                   |
| Anosmia/hyposmia                                                    | 35 (15)                   |
| <b>Colour of nasal discharge in case of rhinorrhoea<sup>c</sup></b> |                           |
| Clear                                                               | 43 (21)                   |
| White                                                               | 40 (20)                   |
| Yellow                                                              | 70 (35)                   |
| Green                                                               | 42 (21)                   |
| Mixed with blood                                                    | 8 (4)                     |
| <b>Snoring</b>                                                      |                           |
| Daily/ often                                                        | 37 (14)                   |
| Sometimes/rarely                                                    | 90 (35)                   |
| Never/ not reported                                                 | 130 (51)                  |
| <b>Periods of snoring<sup>d</sup></b>                               |                           |
| Almost every night                                                  | 35 (28)                   |
| Only during colds                                                   | 54 (42)                   |
| Sometimes also without colds                                        | 29 (23)                   |
| Not reported                                                        | 9 (7)                     |
| <b>Headache</b>                                                     |                           |
| Daily/often                                                         | 27 (10)                   |
| Sometimes/rarely                                                    | 130 (51)                  |
| Never/ not reported                                                 | 100 (39)                  |
| <b>Headache when bending down</b>                                   | 25 (10)                   |
| <b>Migraines</b>                                                    |                           |
| Yes                                                                 | 21 (8)                    |
| No                                                                  | 236 (92)                  |
| <b>SNOT-22 completed</b>                                            | 99 (39)                   |
| Score median (IQR)                                                  | 32 (23-42)                |

EPIC-PCD: Ear-nose throat prospective international cohort of patients with primary ciliary dyskinesia. Hallmark TEM (transmission electron microscopy) defects: outer dynein arm defect (ODA), ODA and inner dynein arm defect (IDA), microtubular disorganisation and IDA defect. Symptoms are presented as N and column %. SNOT-22 presented as median and IQR: interquartile range. Sino Nasal Outcome Test-22 (SNOT-22) questionnaire on chronic rhinosinusitis related items scored 0–5 (“No problem” to “Problem as bad as it can be”), total score range 0–110, mild 0–20, moderate 21–50, severe ≥51. <sup>a</sup>: Among 230 people with chronic nasal symptoms <sup>b</sup>: Among 230 people with chronic nasal symptoms, categories are not exclusive. <sup>c</sup>: Among 203 people with rhinorrhoea, categories are not exclusive. <sup>d</sup>: Among 127 people with snoring.

**Table S4:** Sinonasal examination results of EPIC-PCD participants with positive PCD diagnosis (bi-allelic mutation or hallmark TEM defect) (N=251)

|                                            | PCD positive N (%) |
|--------------------------------------------|--------------------|
| <b>ENT consultations on site</b>           | 251 (100)          |
| <b>Nose appearance</b>                     |                    |
| Normal                                     | 133 (53)           |
| Blocked                                    | 111 (44)           |
| Not recorded                               | 7 (3)              |
| <b>Nasal discharge present</b>             |                    |
| Yes                                        | 181 (72)           |
| No                                         | 63 (25)            |
| Not recorded                               | 7 (3)              |
| <b>Type of nasal discharge<sup>a</sup></b> |                    |
| Serous                                     | 55 (30)            |
| Sero-mucous                                | 85 (47)            |
| Muco-purulent                              | 35 (19)            |
| Mixed with blood                           | 1 (1)              |
| Not recorded                               | 5 (3)              |
| <b>Nasal mucosa</b>                        |                    |
| Abnormal                                   | 113 (45)           |
| Normal                                     | 128 (51)           |
| Not recorded                               | 10 (4)             |
| <b>Nasal polyps</b>                        |                    |
| Yes                                        | 36 (14)            |
| No                                         | 193 (77)           |
| Not assessed                               | 22 (9)             |
| <b>Nasal polyps size<sup>bc</sup></b>      |                    |
| Fully blocking                             | 7 (19)             |
| Partially blocking                         | 27 (75)            |
| Not assessed                               | 2 (6)              |
| <b>Bilaterally<sup>bc</sup></b>            |                    |
| Fully blocking                             | 3 (8)              |
| Partially blocking                         | 12 (33)            |
| Not recorded                               | 21 (59)            |
| <b>Unilaterally<sup>bc</sup></b>           |                    |
| Fully blocking                             | 4 (11)             |
| Partially blocking                         | 19 (53)            |
| Not recorded                               | 13 (36)            |

EPIC-PCD: Ear-nose throat prospective international cohort of patients with primary ciliary dyskinesia. Hallmark TEM (transmission electron microscopy) defects: outer dynein arm defect (ODA), ODA and inner dynein arm defect (IDA), microtubular disorganisation and IDA defect. Examination findings are presented as N and column %. <sup>a</sup>: Among 181 people with nasal discharge. <sup>b</sup>: Among 36 people with nasal polyps. <sup>c</sup>: Nasal polyps described as partially blocking or with Lildholdt score 1 or 2, fully blocking or with Lildholdt score 3.

**Table S4 (continued):** Sinonasal examination results of EPIC-PCD participants with positive PCD diagnosis (bi-allelic mutation or hallmark TEM defect) (N=251)

|                                   | <b>PCD positive N (%)</b> |
|-----------------------------------|---------------------------|
| <b>ENT consultations on site</b>  | 251 (100)                 |
| <b>Inferior nasal turbinates</b>  |                           |
| Normal                            | 140 (56)                  |
| Hypertrophy                       | 87 (35)                   |
| Atrophy                           | 3 (1)                     |
| Not recorded                      | 21 (8)                    |
| <b>Deviated nasal septum</b>      |                           |
| Yes                               | 79 (31)                   |
| Bulging forward                   | 4 (2)                     |
| No                                | 148 (59)                  |
| Not recorded                      | 20 (8)                    |
| <b>Facial pain or sensitivity</b> |                           |
| Yes                               | 39 (16)                   |
| No                                | 194 (77)                  |
| Not recorded                      | 18 (7)                    |

EPIC-PCD: Ear-nose throat prospective international cohort of patients with primary ciliary dyskinesia. Hallmark TEM (transmission electron microscopy) defects: outer dynein arm defect (ODA), ODA and inner dynein arm defect (IDA), microtubular disorganisation and IDA defect. Examination findings are presented as N and column %.

**Table S5:** Upper airway management of EPIC-PCD participants, overall and by age group (N=384)

|                                                                        | Total N (%) | Age 0-6 y<br>N (%) | Age 7-14 y<br>N (%) | Age 15-30 y<br>N (%) | Age 31-50 y<br>N (%) | Age >50 y<br>N (%) | p-value <sup>a</sup> |
|------------------------------------------------------------------------|-------------|--------------------|---------------------|----------------------|----------------------|--------------------|----------------------|
| <b>Number of participants</b>                                          | 384 (100)   | 44 (100)           | 122 (100)           | 153 (100)            | 42 (100)             | 23 (100)           |                      |
| <b>Hospitalisation since last consultation</b>                         | 76 (20)     | 7 (16)             | 17 (14)             | 25 (16)              | 18 (43)              | 9 (39)             | <0.001               |
| Not recorded                                                           | 308 (80)    | 37 (84)            | 105 (86)            | 128 (84)             | 24 (57)              | 14 (61)            |                      |
| For sinonasal surgeries                                                | 9 (2)       | 0 (0)              | 3 (2)               | 2 (1)                | 3 (7)                | 1 (4)              | 0.202                |
| For other surgeries                                                    | 11 (3)      | 0 (0)              | 2 (2)               | 4 (3)                | 0 (0)                | 5 (22)             | <0.001               |
| i.v. antibiotics <sup>b</sup>                                          | 45 (12)     | 2 (5)              | 10 (8)              | 15 (10)              | 13 (31)              | 5 (22)             | 0.004                |
| Further testing/ annual check-up                                       | 11 (3)      | 5 (11)             | 2 (2)               | 4 (3)                | 0 (0)                | 0 (0)              | 0.014                |
| <b>Antibiotics prescribed for infection of upper respiratory tract</b> | 17 (4)      | 1 (2)              | 6 (5)               | 10 (7)               | 0 (0)                | 0 (0)              | 0.019                |
| lower respiratory tract                                                | 71 (19)     | 9 (20)             | 27 (22)             | 23 (15)              | 9 (21)               | 3 (13)             |                      |
| other                                                                  | 20 (5)      | 2 (5)              | 3 (2)               | 5 (3)                | 6 (15)               | 4 (17)             |                      |
| Not recorded                                                           | 276 (72)    | 32 (73)            | 86 (71)             | 115 (75)             | 27 (64)              | 16 (70)            |                      |
| <b>Nasal corticosteroids</b>                                           | 82 (21)     | 3 (7)              | 19 (15)             | 34 (22)              | 17 (40)              | 9 (39)             | <0.001               |
| No                                                                     | 249 (64)    | 33 (75)            | 91 (75)             | 100 (66)             | 18 (43)              | 4 (17)             |                      |
| Not recorded                                                           | 56 (15)     | 8 (18)             | 12 (10)             | 19 (12)              | 7 (17)               | 10 (44)            |                      |
| During all year                                                        | 69 (18)     | 1 (2)              | 17 (13)             | 30 (20)              | 13 (31)              | 8 (35)             | 0.013                |
| During exacerbations                                                   | 11 (3)      | 2 (5)              | 2 (2)               | 4 (3)                | 3 (7)                | 0 (0)              | 0.374                |
| <b>Nasal rinsing</b>                                                   | 187 (49)    | 11 (25)            | 63 (50)             | 80 (51)              | 23 (54)              | 10 (34)            | <0.001               |
| No                                                                     | 110 (28)    | 20 (45)            | 44 (39)             | 40 (27)              | 4 (9)                | 2 (9)              |                      |
| Not recorded                                                           | 87 (23)     | 13 (30)            | 15 (11)             | 33 (22)              | 15 (37)              | 11 (47)            |                      |
| During all year                                                        | 154 (40)    | 10 (23)            | 55 (45)             | 64 (42)              | 17 (40)              | 8 (35)             | 0.536                |
| During exacerbations                                                   | 20 (5)      | 1 (2)              | 5 (4)               | 9 (6)                | 3 (7)                | 2 (9)              | 0.692                |
| <b>Regular nose blowing</b>                                            | 164 (43)    | 17 (39)            | 63 (52)             | 53 (35)              | 21 (50)              | 10 (44)            | <0.001               |
| No                                                                     | 118 (31)    | 12 (27)            | 40 (33)             | 60 (39)              | 5 (12)               | 1 (4)              |                      |
| No recorded                                                            | 102 (26)    | 15 (34)            | 19 (15)             | 40 (26)              | 16 (48)              | 12 (52)            |                      |
| During all year                                                        | 149 (39)    | 16 (36)            | 61 (50)             | 47 (31)              | 17 (40)              | 8 (35)             | 0.315                |
| During exacerbations                                                   | 5 (1)       | 0 (0)              | 1 (1)               | 3 (2)                | 1 (2)                | 0 (0)              | 0.744                |
| <b>Nebulisation</b>                                                    | 46 (12)     | 2 (5)              | 16 (13)             | 15 (10)              | 10 (23)              | 3 (13)             | <0.001               |
| No                                                                     | 212 (55)    | 26 (59)            | 80 (66)             | 88 (58)              | 12 (29)              | 6 (26)             |                      |
| Not recorded                                                           | 126 (33)    | 16 (36)            | 26 (21)             | 50 (32)              | 20 (48)              | 14 (61)            |                      |
| During all year                                                        | 43 (11)     | 2 (5)              | 15 (12)             | 15 (10)              | 8 (19)               | 3 (13)             | 0.279                |
| During exacerbations                                                   | 0 (0)       | 0 (0)              | 0 (0)               | 0 (0)                | 0 (0)                | 0 (0)              |                      |
| Isotonic saline                                                        | 17 (4)      | 0 (0)              | 6 (5)               | 4 (3)                | 6 (14)               | 1 (4)              | 0.025                |
| Hypertonic saline                                                      | 22 (6)      | 2 (5)              | 7 (6)               | 9 (6)                | 3 (7)                | 1 (4)              | 0.989                |

EPIC-PCD: Ear-nose throat prospective international cohort of patients with primary ciliary dyskinesia. y: years. Isotonic saline: NaCl 0.9%. Hypertonic saline: NaCl >0.9%. <sup>a</sup>: Chi-square test of independence. <sup>b</sup>: i.v. antibiotics for acute pulmonary exacerbations or Pseudomonas eradication.

**Table S6:** Association of EPIC-PCD study centre with sinonasal disease (N=384)

|                      | <b>Number of participants (%)</b> | <b>Odds ratio</b> | <b>95% confidence interval</b> |
|----------------------|-----------------------------------|-------------------|--------------------------------|
| <b>Study centres</b> | 384 (100)                         |                   |                                |
| Paris                | 52 (14)                           |                   | <b>Reference</b>               |
| Amsterdam            | 26 (7)                            | 0.19              | 0.04–0.88                      |
| Ankara               | 60 (16)                           | 0.57              | 0.25–1.32                      |
| Berlin               | 43 (11)                           | 1.28              | 0.56–2.93                      |
| Bern                 | 7 (2)                             | 0.00              | 0.00–0.00                      |
| Cyprus               | 21 (5)                            | 3.23              | 1.21–8.63                      |
| Istanbul             | 58 (15)                           | 2.76              | 1.29–5.92                      |
| Leuven               | 11 (3)                            | 2.74              | 1.29–5.92                      |
| Liège                | 10 (3)                            | 3.59              | 0.99–13.06                     |
| Oslo                 | 38 (10)                           | 0.60              | 0.23–1.56                      |
| Southampton          | 42 (10)                           | 0.30              | 0.10–0.90                      |
| Valencia             | 16 (4)                            | 0.55              | 0.14–2.16                      |

Results of univariable ordinal logistic regression model, including only study centre as an explanatory variable (reference centre: Paris). Sinonasal disease defined with composite outcome score consisting of three variables: patient-reported headache while bending down as a proxy for sinusitis, and ENT examination findings of nasal polyps and facial pain. EPIC-PCD: Ear-nose throat prospective international cohort of patients with primary ciliary dyskinesia.

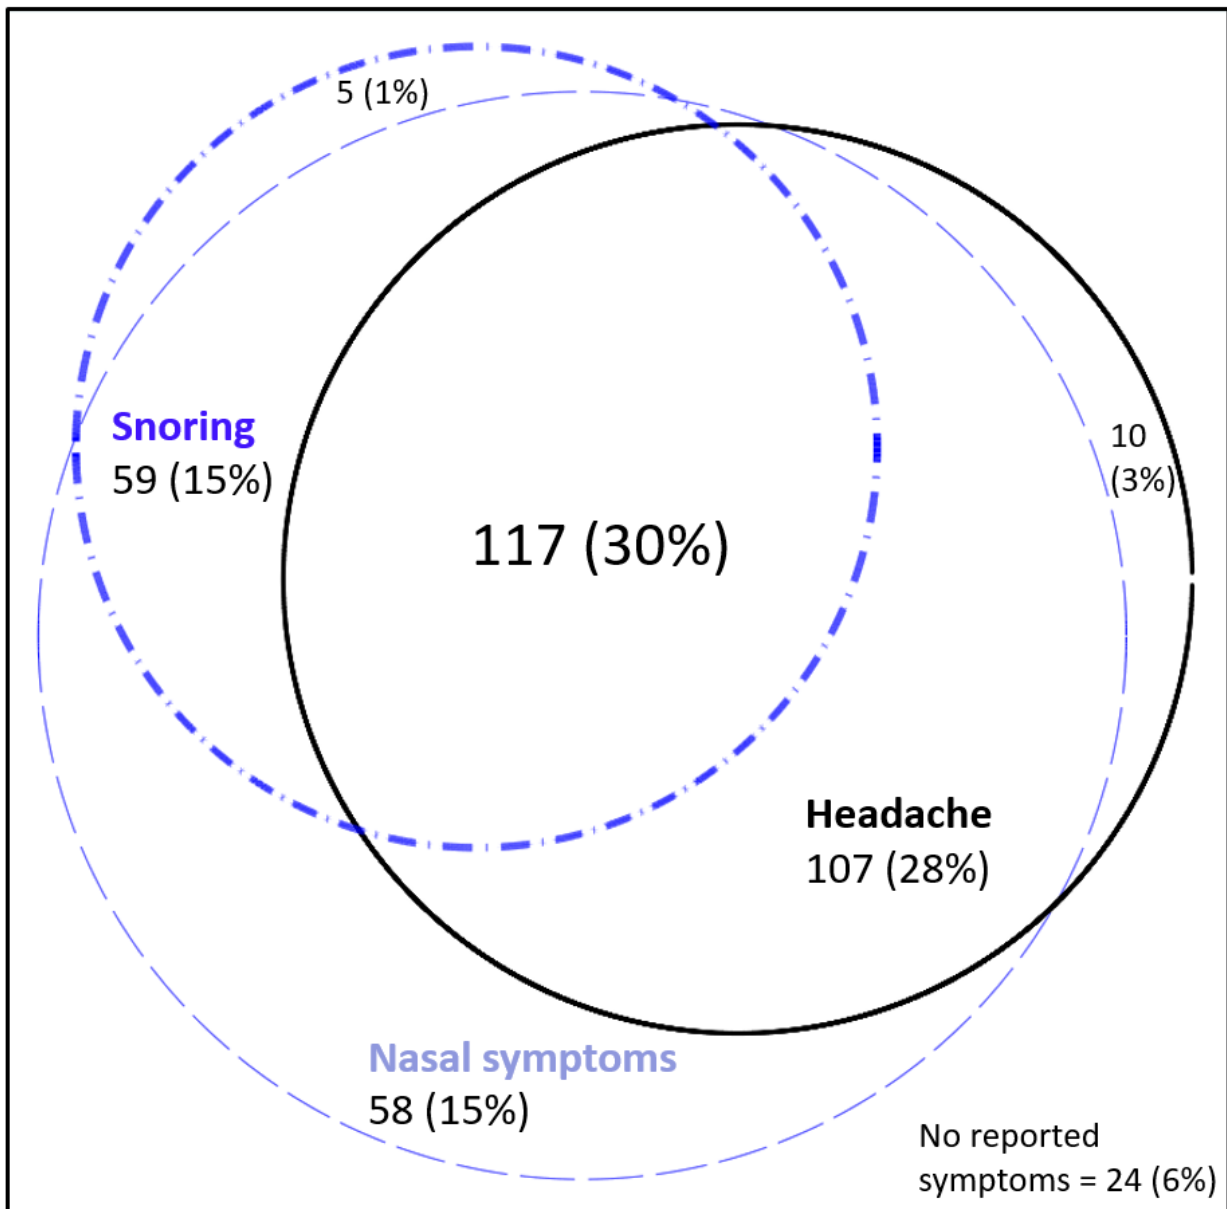

**Figure S1:** Proportion of patient-reported symptoms (snoring, headache, nasal symptoms) during the past three months among EPIC-PCD participants (N=384).

EPIC-PCD: Ear-nose throat prospective international cohort of patients with primary ciliary dyskinesia.



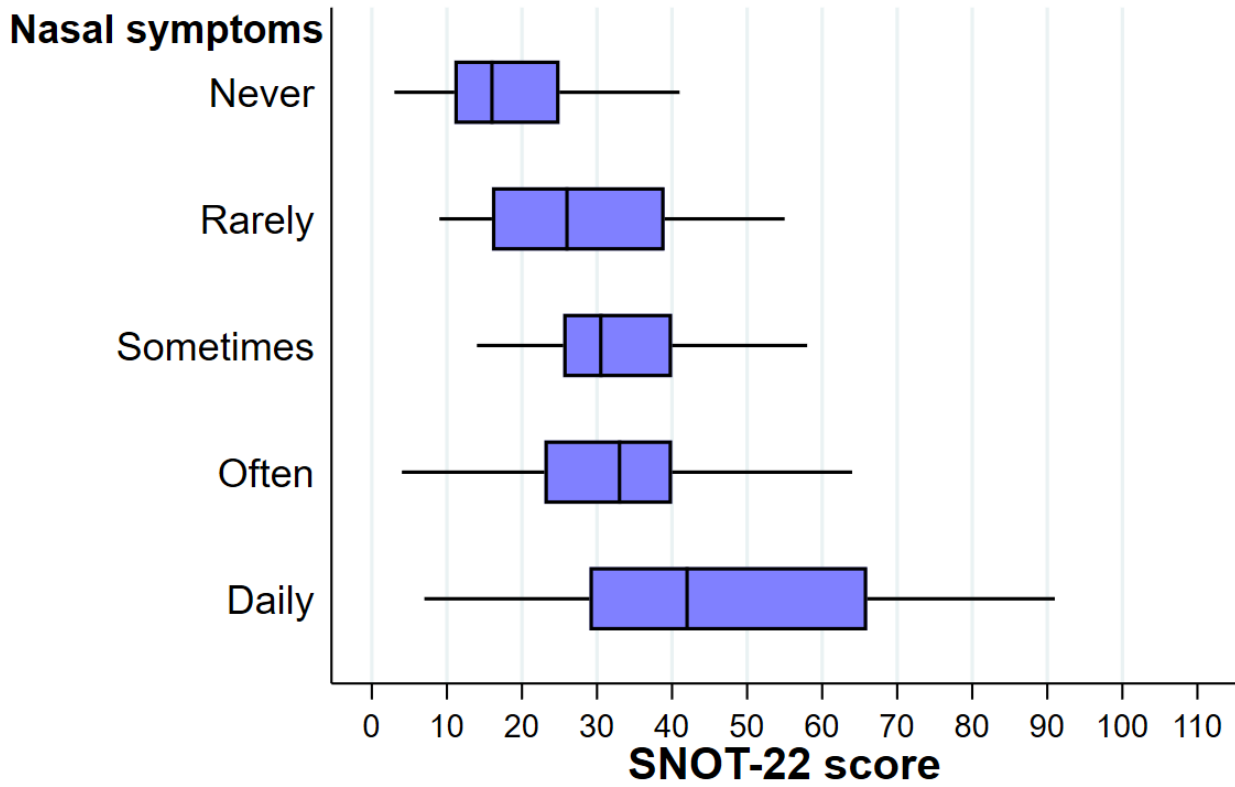

**Figure S2:** Sino-Nasal Outcome Test (SNOT)-22 score by frequency of patient-reported nasal symptoms during the past three months among EPIC-PCD participants (N=136).

SNOT-22 scores 0–5 (“No problem” to “Problem as bad as it can be”); total score range 0–110; mild 0–20, moderate 21–50; severe  $\geq 51$ . Score ranges indicated by horizontal lines. EPIC-PCD: Ear-nose throat prospective international cohort of patients with primary ciliary dyskinesia.

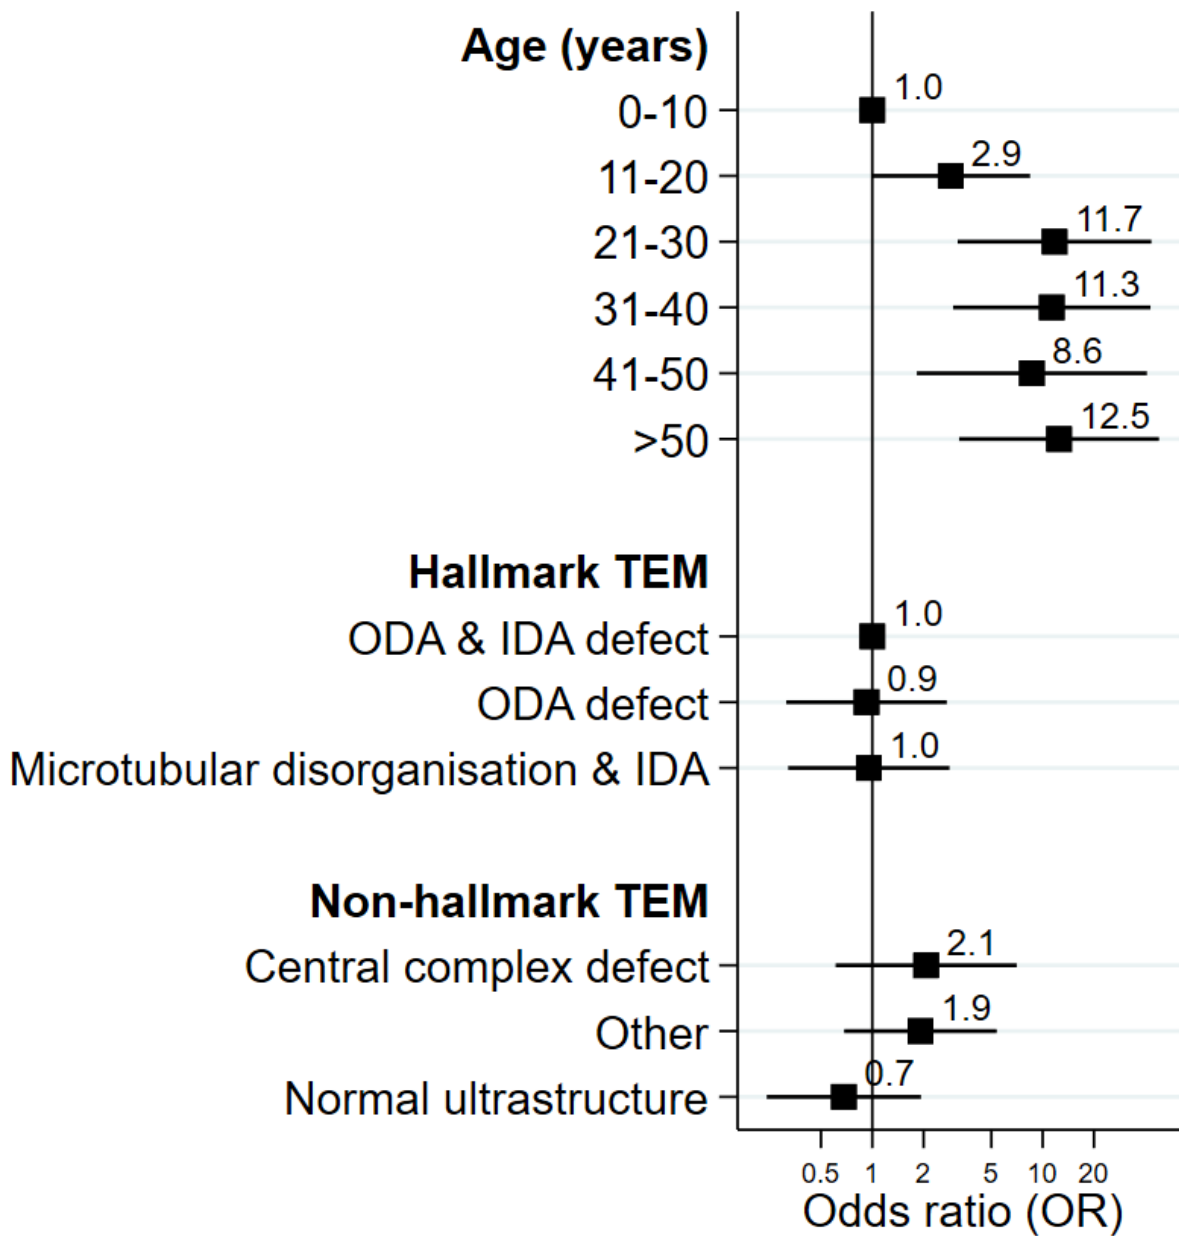

**Figure S3:** Association of age and ciliary ultrastructural defect with sinonasal disease in EPIC-PCD participants (N=197).

Sinonasal disease defined by composite outcome score consisting of three variables: patient-reported headache while bending down as a proxy for sinusitis, ENT examination findings of nasal polyps, and facial pain. EPIC-PCD: Ear-nose throat prospective international cohort of patients with primary ciliary dyskinesia. ODA: outer dynein arm. IDA: inner dynein arm. TEM: transmission electron microscopy. Odds ratio (OR) indicated by squares and 95% CI indicated by horizontal lines.
